# Supplementary material for: CRKL oncogene is downregulated by p53 through miR-200s
Source: PubMed Central journal article supplement — Cancer Sci. 2015 Jul 14;106(8):1033–40. doi: 10.1111/cas.12713 (PMC4556393; doi:10.1111/cas.12713), 2015-07-14
Supplement: cas0106-1033-sd1.pdf [file cas0106-1033-sd1.pdf]

(a)

hsa-miR-200b 3'-aguaguaaugguccGUCAUAAu-5'  
 hsa-miR-200c 3'-agguaguaaugggccGUCAUAAu-5'  
 hsa-miR-429 3'-ugccaaaugggucuGUCAUAAu-5'  
  
 hsa-miR-141 3'-gguagaaugggucuGUCACAAu-5'  
 hsa-miR-200a 3'-uguagcaugggucuGUCACAAu-5'

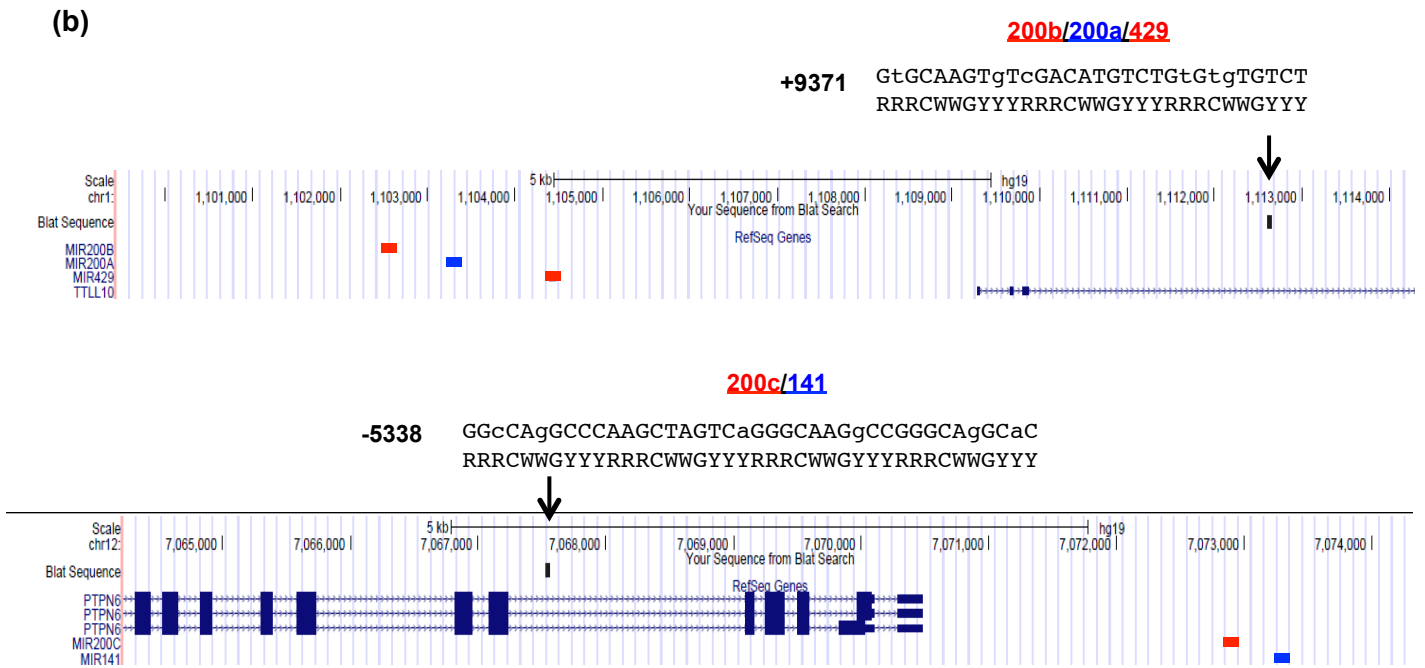

**Fig. S1.** The miR-200 family members
