# Supplementary material for: CRKL oncogene is downregulated by p53 through miR-200s
Source: PubMed Central journal article supplement — Cancer Sci. 2015 Jul 14;106(8):1033–40. doi: 10.1111/cas.12713 (PMC4556393; doi:10.1111/cas.12713), 2015-07-14
Supplement: cas0106-1033-sd8.pdf [file cas0106-1033-sd8.pdf]

(a)

| Analysis Type by Cancer     | Cancer vs. Normal |   |
|-----------------------------|-------------------|---|
| Bladder Cancer              | 1                 |   |
| Brain and CNS Cancer        | 3                 |   |
| Breast Cancer               | 3                 |   |
| Cervical Cancer             | 1                 |   |
| Colorectal Cancer           | 1                 |   |
| Esophageal Cancer           |                   | 2 |
| Gastric Cancer              | 1                 |   |
| Head and Neck Cancer        | 5                 |   |
| Kidney Cancer               | 1                 |   |
| Leukemia                    | 3                 | 2 |
| Liver Cancer                |                   |   |
| Lung Cancer                 | 1                 |   |
| Lymphoma                    | 2                 | 2 |
| Melanoma                    |                   |   |
| Myeloma                     | 1                 |   |
| Other Cancer                | 6                 | 1 |
| Ovarian Cancer              |                   | 1 |
| Pancreatic Cancer           |                   |   |
| Prostate Cancer             |                   |   |
| Sarcoma                     |                   |   |
| Significant Unique Analyses | 29                | 7 |
| Total Unique Analyses       | 300               |   |

(b)

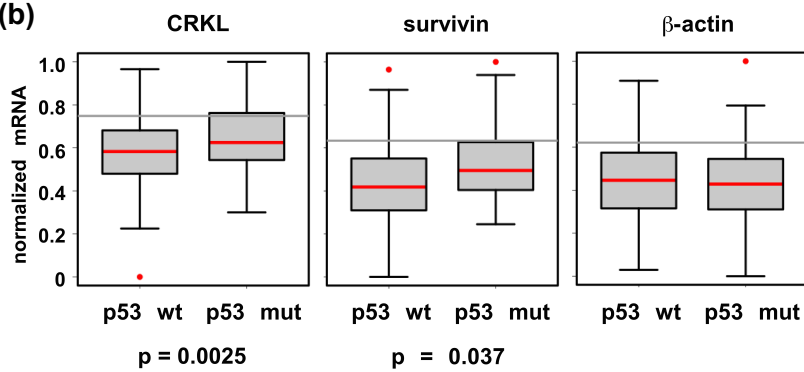

**Fig. S8.** *CRKL* expression profiles in human tumors using published human oncology microarray data in OncoPrint (www.oncoPrint.org)
