# Supplementary material for: CRKL oncogene is downregulated by p53 through miR-200s
Source: PubMed Central journal article supplement — Cancer Sci. 2015 Jul 14;106(8):1033–40. doi: 10.1111/cas.12713 (PMC4556393; doi:10.1111/cas.12713), 2015-07-14
Supplement: cas0106-1033-sd9.pdf [file cas0106-1033-sd9.pdf]

**DATASET** GSE30929  
**CANCER\_TYPE** Soft tissue cancer  
**SUBTYPE** Liposarcoma  
**N** 140  
**ENDPOINT** Distant Recurrence Free Survival  
**COHORT** MSKCC (1993-2008)  
**ARRAY TYPE** HG-U133A  
**CONTRIBUTOR** Gobble  
**MINIMUM P-VALUE** 0.000001  
**CORRECTED P-VALUE** 0.000033  
**In(HR<sub>high</sub> / HR<sub>low</sub>)** 1.42  
**COX P-VALUE** 0.002150  
**In(HR)** 0.77  
**HR [95% CI]** 2.16 [1.32-3.53]

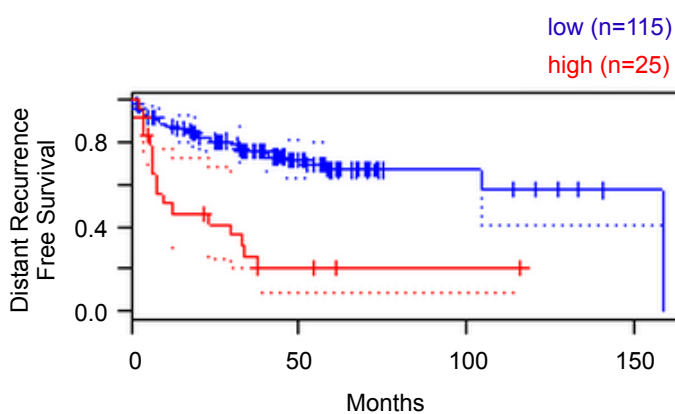

**DATASET** jacob-00182-UM  
**CANCER\_TYPE** Lung cancer  
**SUBTYPE** Adenocarcinoma  
**N** 178  
**ENDPOINT** Overall Survival  
**COHORT** UM  
**ARRAY TYPE** HG-U133A  
**CONTRIBUTOR** Shedden  
**MINIMUM P-VALUE** 0.002191  
**CORRECTED P-VALUE** 0.048805  
**In(HR<sub>high</sub> / HR<sub>low</sub>)** 0.62  
**COX P-VALUE** 0.016869  
**In(HR)** 1.39  
**HR [95% CI]** 4.03 [1.29-12.67]

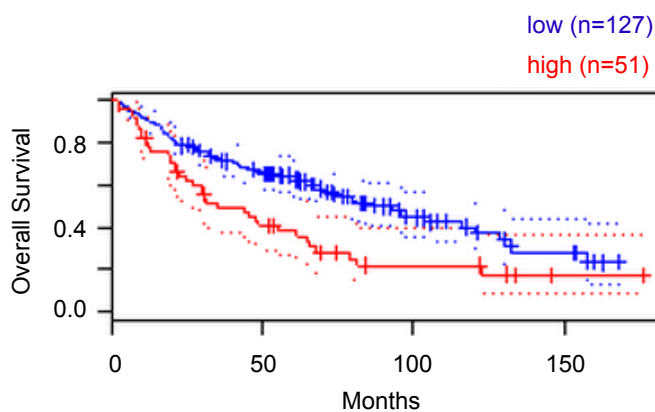

**Fig. S9.** The correlation between *CRKL* expression and prognosis among cancer patients
