# Supplementary figures and images for: CRKL oncogene is downregulated by p53 through miR-200s
Source: PubMed Central journal article supplement — Cancer Sci. 2015 Jul 14;106(8):1033–40. doi: 10.1111/cas.12713 (PMC4556393; doi:10.1111/cas.12713), 2015-07-14

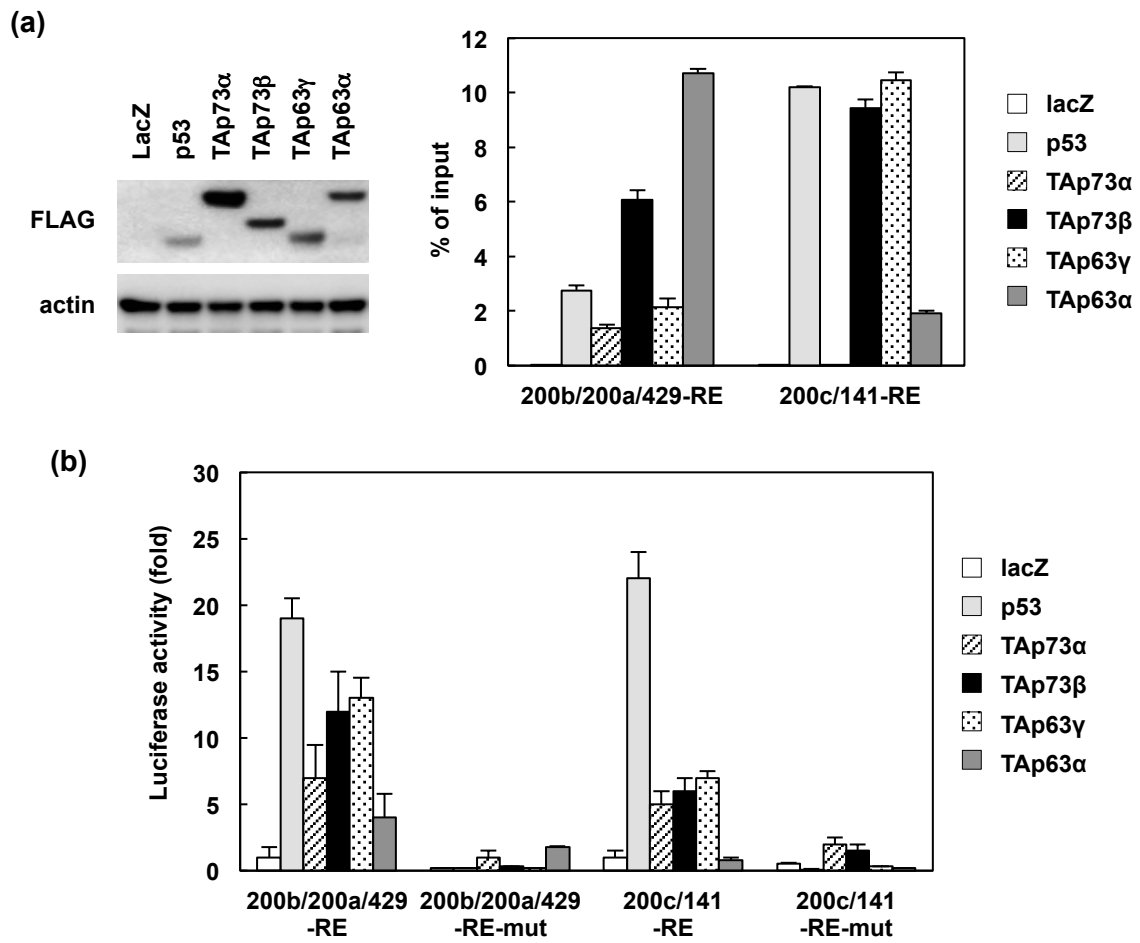

**Fig. S2.** miR-200 family members are direct targets of p53 family

Supplement: cas0106-1033-sd2.pdf [file cas0106-1033-sd2.pdf]

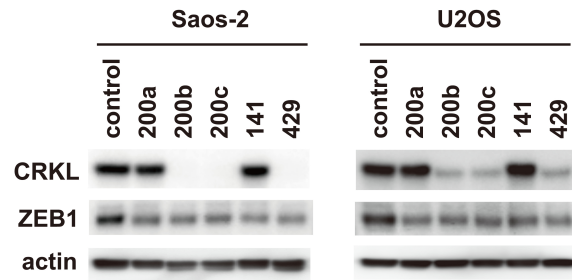

**Fig. S3.** CRKL protein is downregulated by miR-200b/200c/429 in Saos2 and U2OS cells.

Supplement: cas0106-1033-sd3.pdf [file cas0106-1033-sd3.pdf]

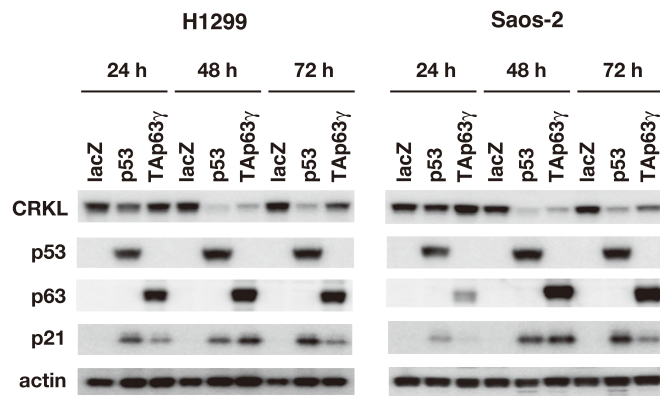

**Fig. S4.** Downregulation of CRKL by p53 and TAp63 $\gamma$

Supplement: cas0106-1033-sd4.pdf [file cas0106-1033-sd4.pdf]

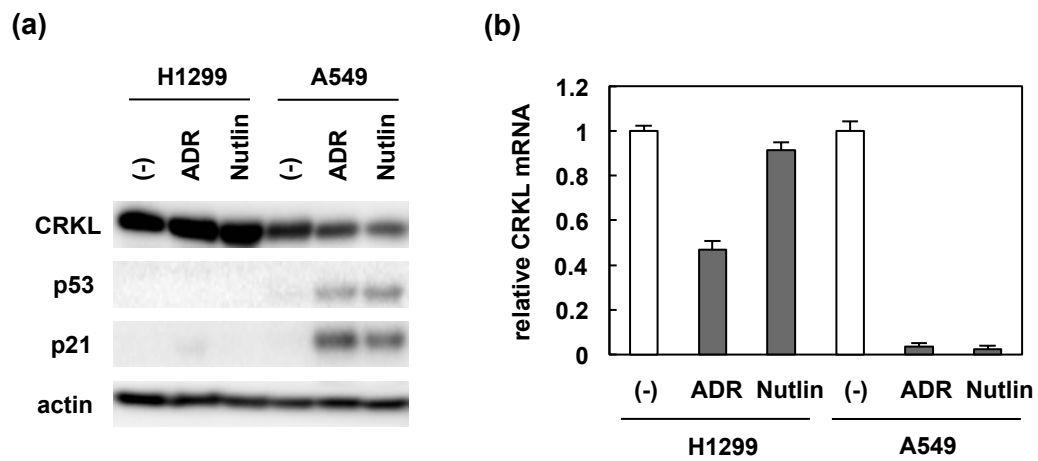

**Fig. S5.** Endogenous p53 downregulates CRKL protein and mRNA levels in human lung cancer cells

Supplement: cas0106-1033-sd5.pdf [file cas0106-1033-sd5.pdf]

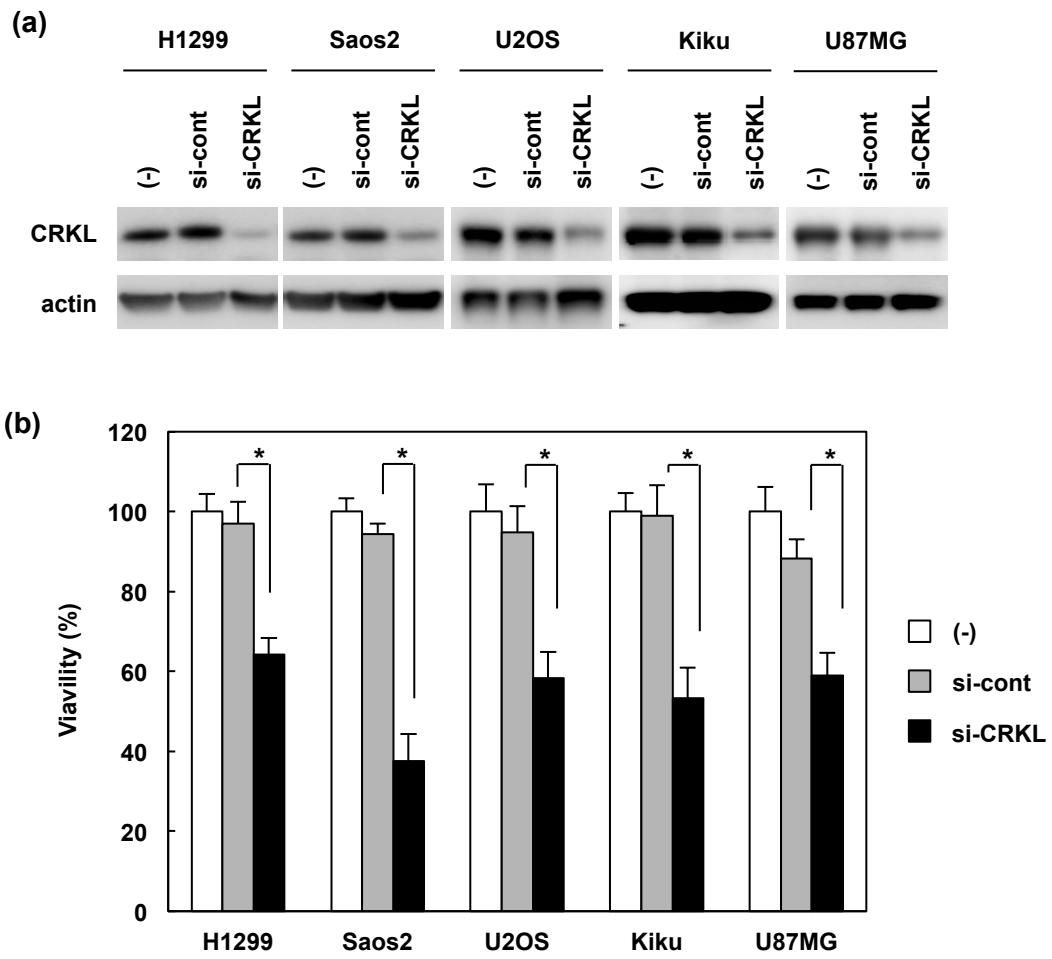

**Fig. S6.** Downregulation of CRKL by siRNA inhibits cancer cell growth

Supplement: cas0106-1033-sd6.pdf [file cas0106-1033-sd6.pdf]

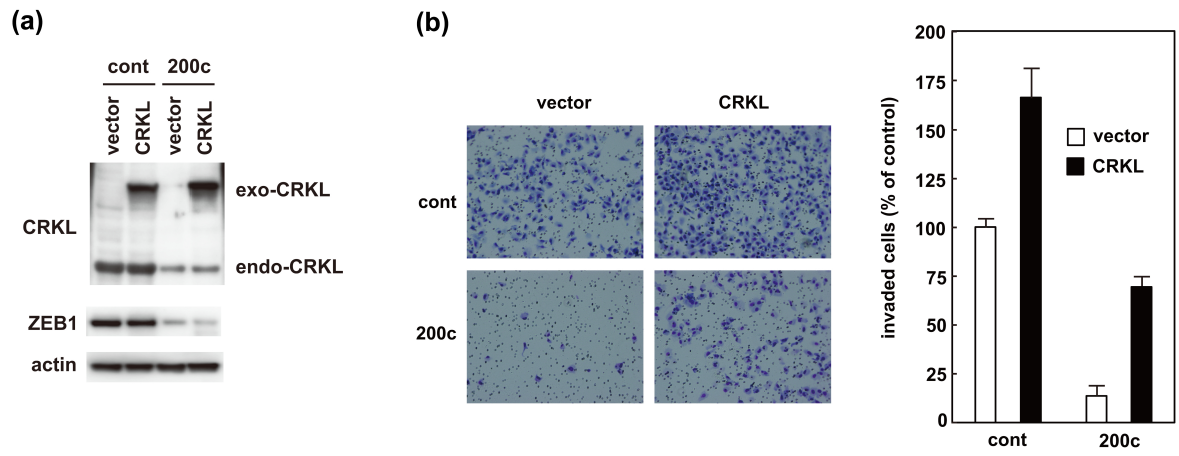

**Fig. S7.** CRKL prevents miR-200c-mediated inhibition of cell invasion

Supplement: cas0106-1033-sd7.pdf [file cas0106-1033-sd7.pdf]
